# Supplementary material for: Reactions of a methylmercury zwitterionic thiolate complex [MeHg(Tab)]PF6 with various donor ligands: relevance to methylmercury detoxification
Source: Royal Society of Chemistry journal article supplement (doi:10.1039/c2dt12219g), 2012-01-01
Supplement: c2dt12219g.pdf [file c2dt12219g.pdf]

## Electronic Supplementary Information (ESI)

### Reactions of a methylmercury zwitterionic thiolate complex 5 [MeHg(Tab)]PF<sub>6</sub> with various ligands: relevance to methylmercury detoxification

Ai-Xia Zheng,<sup>a</sup> Hong-Xi Li,<sup>a</sup> Kai-Peng Hou,<sup>a</sup> Jing Shi,<sup>a</sup> Hui-Fang Wang,<sup>a</sup> Zhi-Gang Ren<sup>a</sup> and  
10 Jian-Ping Lang<sup>\*a,b</sup>

<sup>a</sup> College of Chemistry, Chemical Engineering and Materials Science, Soochow University, Suzhou 215123, People's  
Republic of China

15 <sup>b</sup> State Key Laboratory of Coordination Chemistry, Nanjing University, Nanjing 210093, P. R. China

20

25

|                                                                                                       |    |
|-------------------------------------------------------------------------------------------------------|----|
| <b>Figure S1.</b> The positive-ion ESI mass spectrum of [Hg(4,6-Me <sub>2</sub> pymS) <sub>2</sub> ]. | S3 |
| <b>Figure S2.</b> The positive-ion ESI mass spectrum of <b>1</b> .                                    | S3 |
| <b>Figure S3.</b> The positive-ion ESI mass spectrum of <b>2</b> .                                    | S3 |
| <b>Figure S4.</b> The positive-ion ESI mass spectrum of <b>3</b> .                                    | S3 |
| <b>Figure S5.</b> The positive-ion ESI mass spectrum of <b>4</b> .                                    | S4 |
| <b>Figure S6.</b> The positive-ion ESI mass spectrum of <b>6</b> .                                    | S4 |

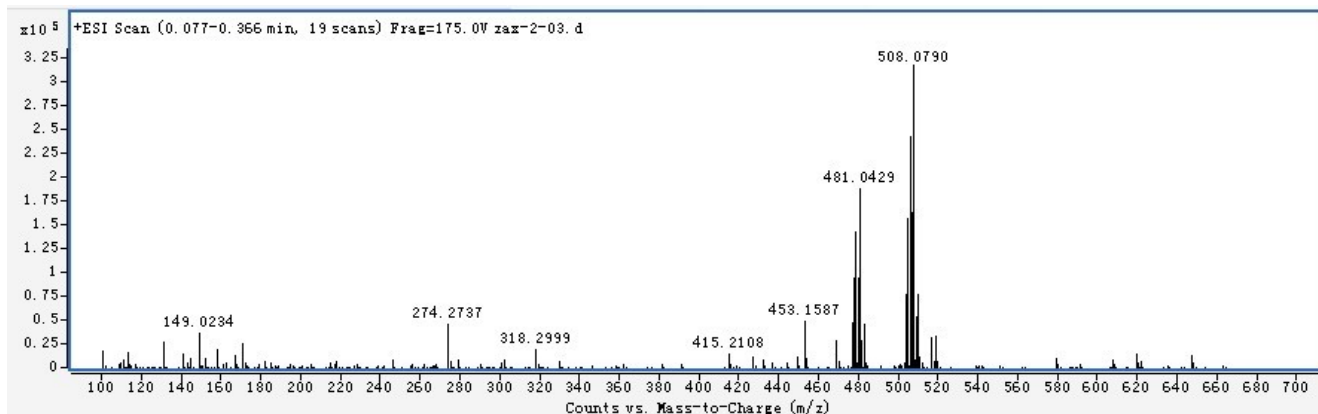

Figure S1. The positive-ion ESI mass spectrum of [Hg(4,6-Me<sub>2</sub>pymS)<sub>2</sub>].

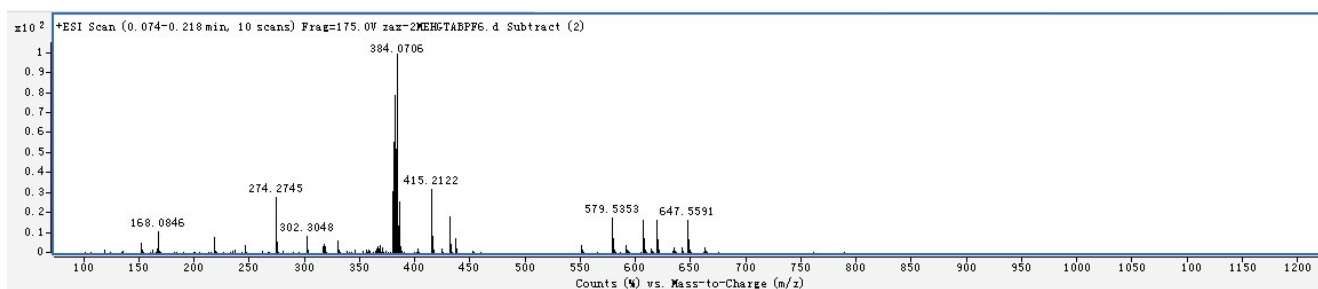

5

Figure S2. The positive-ion ESI mass spectrum of 1.

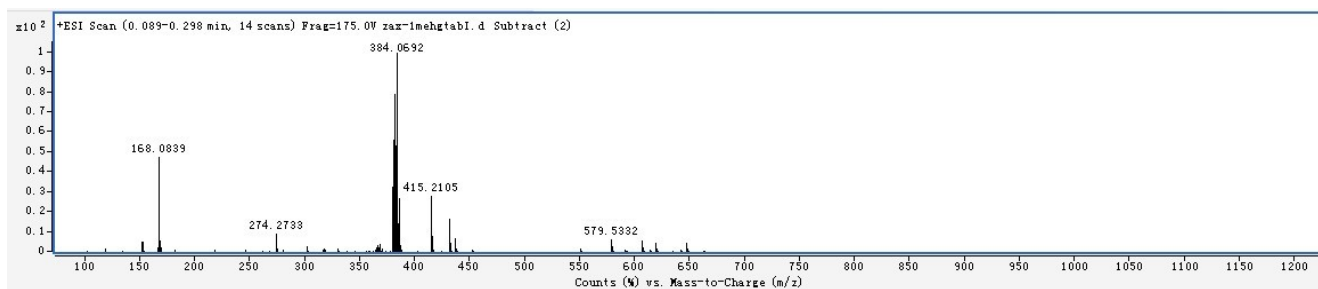

Figure S3. The positive-ion ESI mass spectrum of 2.

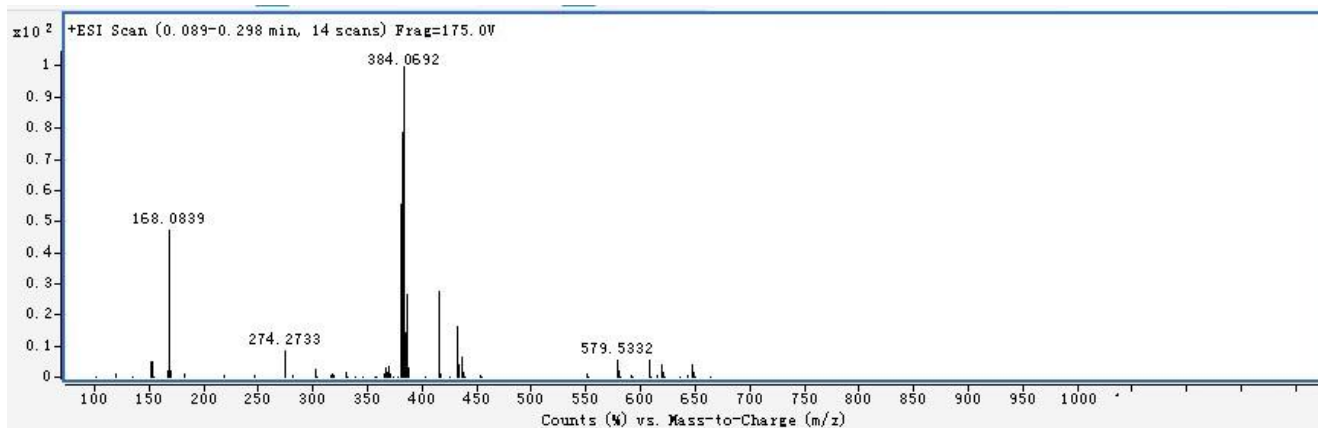

10

Figure S4. The positive-ion ESI mass spectrum of 3.

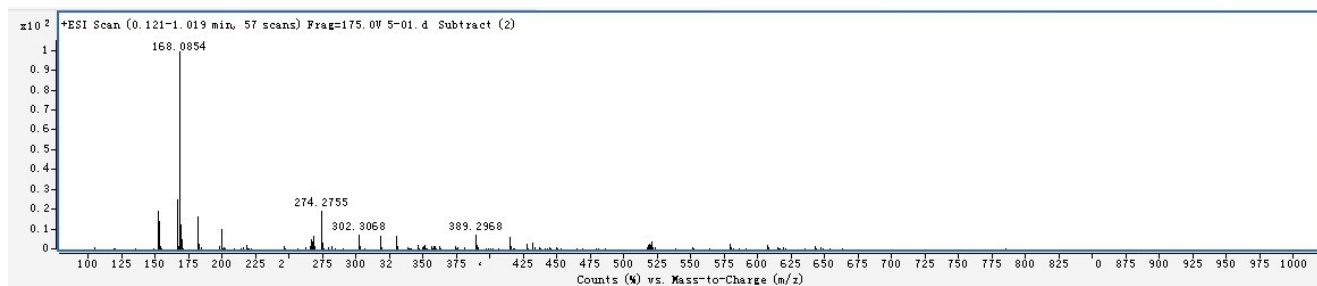

Figure S5. The positive-ion ESI mass spectrum of **4**.

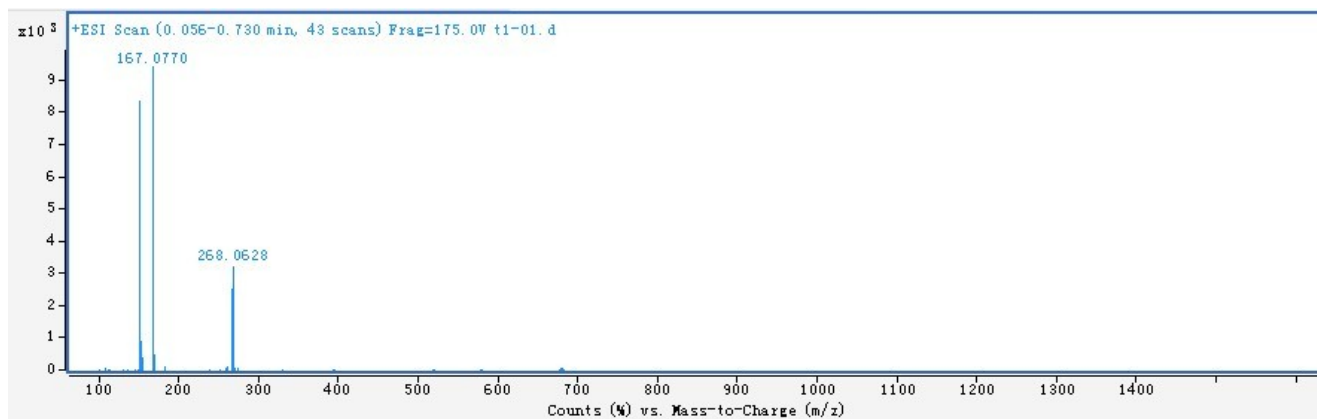

Figure S6. The positive-ion ESI mass spectrum of **6**.

5
